# Supplementary material for: Burkholderia pseudomallei BipD hijacks host KLHL9/KLHL13/CUL3 E3 ligase to ubiquitinate IMMT that initiates mitophagy to evade killing
Source: Research Square preprint supplement (doi:10.21203/rs.3.rs-3289295/v1), 2023-09-15
Supplement: Supplementary file 1 [file 44278070f7936dcc43d7a63f.docx]

**Supplementary Tables**

| No. | Gene ID | No. Uniprot | Locus of gene | Function | iLIR(star-end)b | PSSMc |
| --- | --- | --- | --- | --- | --- | --- |
| 1 | BPSL0959 | Q63WC9 | Outside of Annotated T3SS Clusters (1116994-1117959) | Sulfate adenylyltransferase | 76-81;87-92;206-211;212-217;262-267 | 1;9;18;15;2 |
| 2 | BPSS1401 | Q63KF9 | T3SS Cluster 1 (1914705-1916822) | Type III secretion-associated protein | 413-418;63-68;69-74;98-103;114-119;122-127;226-231;286-291;302-307;397-402;498-503;511-516;629-634;678-683;684-689 | 12;4;6;6;2;7;5;7;7;-1;2;5;9;18;10 |
| 3 | BPSS1529 | Q63K37 | T3SS Cluster 3 (2082841-2083773) | Translocator protein BipD; Needle tip protein | 14-19;59-64;145-150;156-161;284-289;305-310 | 18;11;9;5;9;10 |
| 4 | BPSS1537 | Q63K29 | T3SS Cluster 3 (2090401-2091081) | Surface presentation of antigens protein; Inner-membrane export apparatus | 208-213;29-34;71-76;144-149;164-169;219-224 | 20;4;5;5;5;8 |
| 5 | BPSS1538 | Q63K28 | T3SS Cluster 3 (2091071-2092042) | Surface presentation of antigens protein; C-ring component | 56-61;6-11;41-46;48-53;67-72;75-80;103-108 | 21;0;9;11;5;10;13 |
| 6 | BPSS1617 | Q63JU7 | T3SS Cluster 2 (2191756-2192406) | Type III secretion protein | 2-7;28-33;163-168;202-207 | 3;7;5;19 |
| 7 | BPSS1620 | Q63JU4 | T3SS Cluster 2 (2194317-2196389) | Type III secretion protein | 659-664;64-69;70-75;99-104;115-120;123-128;227-232;285-290;293-298;304-309;394-399;492-497;509-514;610-615;665-670 | 19;3;6;8;5;7;5;1;4;7;0;2;7;9;10 |
| 8 | BPSS1648 | Q63JR8 | Outside of Annotated T3SS Clusters (2265019-2266446) | Response regulator | 253-258;350-355;61-66;117-122;133-138;260-265;388-293 | 18;16;6;9;3;-1;11 |

**Supplementary Table 1. Predicted LIR motifsa in Type III secrection system proteins of *B. pseudomallei***

a. A short peptide sequence motif mediated the interaction between autophagy receptors and LC3 is called the LC3-interacting region (LIR) motif.

b. A computational approach for predicting LC3-interaction regions in proteins by the iLIR database.

c. The position-specific scoring matrix of LIR-containing proteins.

| **Supplementary Table 2. Proteins interacting with BipD in HEK293T cells analyzed by IP-MS** | | | | | |
| --- | --- | --- | --- | --- | --- |
| UniProt Accession | Protein Description | Gene Name | Change | log2FC | -log10(P_value) |
| P52732 | Kinesin-like protein KIF11 OS=Homo sapiens OX=9606 GN=KIF11 PE=1 SV=2 | KIF11 | up | 5.897718022 | 4.371655669 |
| Q9P2J3 | Kelch-like protein 9 OS=Homo sapiens OX=9606 GN=KLHL9 PE=1 SV=2 | KLHL9 | up | 5.408789146 | 7.846934572 |
| P81605 | Dermcidin OS=Homo sapiens OX=9606 GN=DCD PE=1 SV=2 | DCD | up | 5.210452121 | 7.084745264 |
| Q9P2N7 | Kelch-like protein 13 OS=Homo sapiens OX=9606 GN=KLHL13 PE=1 SV=3 | KLHL13 | up | 5.14568986 | 5.959474106 |
| Q02413 | Desmoglein-1 OS=Homo sapiens OX=9606 GN=DSG1 PE=1 SV=2 | DSG1 | up | 4.407339155 | 7.185082499 |
| P14923 | Junction plakoglobin OS=Homo sapiens OX=9606 GN=JUP PE=1 SV=3 | JUP | up | 4.01007243 | 4.105343405 |
| P11021 | Endoplasmic reticulum chaperone BiP OS=Homo sapiens OX=9606 GN=HSPA5 PE=1 SV=2 | HSPA5 | up | 3.609511006 | 4.84239643 |
| P14136 | Glial fibrillary acidic protein OS=Homo sapiens OX=9606 GN=GFAP PE=1 SV=1 | GFAP | up | 3.596667715 | 1.607083626 |
| P15924 | Desmoplakin OS=Homo sapiens OX=9606 GN=DSP PE=1 SV=3 | DSP | up | 3.546683322 | 3.143073592 |
| Q9H0A8 | COMM domain-containing protein 4 OS=Homo sapiens OX=9606 GN=COMMD4 PE=1 SV=1 | COMMD4 | up | 3.433041856 | 3.987746125 |
| P68371 | Tubulin beta-4B chain OS=Homo sapiens OX=9606 GN=TUBB4B PE=1 SV=1 | TUBB4B | up | 3.420858323 | 1.617963675 |
| P84077 | ADP-ribosylation factor 1 OS=Homo sapiens OX=9606 GN=ARF1 PE=1 SV=2 | ARF1 | up | 2.965659339 | 1.610431147 |
| Q4ZG55 | Protein GREB1 OS=Homo sapiens OX=9606 GN=GREB1 PE=2 SV=1 | GREB1 | up | 2.841580554 | 2.437941552 |
| Q969E8 | Pre-rRNA-processing protein TSR2 homolog OS=Homo sapiens OX=9606 GN=TSR2 PE=1 SV=1 | TSR2 | up | 2.799918086 | 7.288597267 |
| P09211 | Glutathione S-transferase P OS=Homo sapiens OX=9606 GN=GSTP1 PE=1 SV=2 | GSTP1 | up | 2.766690483 | 1.611431445 |
| Q5VTE0 | Putative elongation factor 1-alpha-like 3 OS=Homo sapiens OX=9606 GN=EEF1A1P5 PE=5 SV=1 | EEF1A1P5 | up | 2.734159485 | 3.350705977 |
| P16152 | Carbonyl reductase [NADPH] 1 OS=Homo sapiens OX=9606 GN=CBR1 PE=1 SV=3 | CBR1 | up | 2.678561379 | 1.577609136 |
| Q96M02 | (E2-independent) E3 ubiquitin-conjugating enzyme FATS OS=Homo sapiens OX=9606 GN=C10orf90 PE=2 SV=2 | C10orf90 | up | 2.584962501 | 3.58531322 |
| Q8IUM7 | Neuronal PAS domain-containing protein 4 OS=Homo sapiens OX=9606 GN=NPAS4 PE=1 SV=1 | NPAS4 | up | 2.574802005 | 6.66461355 |
| P12273 | Prolactin-inducible protein OS=Homo sapiens OX=9606 GN=PIP PE=1 SV=1 | PIP | up | 2.519203899 | 2.498997455 |
| P25705 | ATP synthase subunit alpha, mitochondrial OS=Homo sapiens OX=9606 GN=ATP5F1A PE=1 SV=1 | ATP5F1A | up | 2.494319981 | 5.157902272 |
| P06702 | Protein S100-A9 OS=Homo sapiens OX=9606 GN=S100A9 PE=1 SV=1 | S100A9 | up | 2.415444524 | 3.488246113 |
| Q9BVG8 | Kinesin-like protein KIFC3 OS=Homo sapiens OX=9606 GN=KIFC3 PE=1 SV=4 | KIFC3 | up | 2.372963274 | 5.589018674 |
| P17612 | cAMP-dependent protein kinase catalytic subunit alpha OS=Homo sapiens OX=9606 GN=PRKACA PE=1 SV=2 | PRKACA | up | 2.334962501 | 4.06863244 |
| Q8WZ42 | Titin OS=Homo sapiens OX=9606 GN=TTN PE=1 SV=4 | TTN | up | 2.324802005 | 3.907677483 |
| Q5VZL5 | Zinc finger MYM-type protein 4 OS=Homo sapiens OX=9606 GN=ZMYM4 PE=1 SV=1 | ZMYM4 | up | 2.324802005 | 3.907677483 |
| O95613 | Pericentrin OS=Homo sapiens OX=9606 GN=PCNT PE=1 SV=4 | PCNT | up | 2.316696635 | 1.593809827 |
| P45954 | Short/branched chain specific acyl-CoA dehydrogenase, mitochondrial OS=Homo sapiens OX=9606 GN=ACADSB PE=1 SV=1 | ACADSB | up | 2.29248125 | 1.617335152 |
| Q05823 | 2-5A-dependent ribonuclease OS=Homo sapiens OX=9606 GN=RNASEL PE=1 SV=2 | RNASEL | up | 2.178561379 | 3.820056367 |
| Q7Z3U7 | Protein MON2 homolog OS=Homo sapiens OX=9606 GN=MON2 PE=1 SV=3 | MON2 | up | 2.147178659 | 1.536383125 |
| P38646 | Stress-70 protein, mitochondrial OS=Homo sapiens OX=9606 GN=HSPA9 PE=1 SV=2 | HSPA9 | up | 2.122908635 | 3.177753372 |
| O95881 | Thioredoxin domain-containing protein 12 OS=Homo sapiens OX=9606 GN=TXNDC12 PE=1 SV=1 | TXNDC12 | up | 2.114857905 | 1.479883318 |
| P61626 | Lysozyme C OS=Homo sapiens OX=9606 GN=LYZ PE=1 SV=1 | LYZ | up | 2.098079356 | 3.751114608 |
| P01876 | Immunoglobulin heavy constant alpha 1 OS=Homo sapiens OX=9606 GN=IGHA1 PE=1 SV=2 | IGHA1 | up | 2.084962501 | 2.2811636 |
| Q96HU8 | GTP-binding protein Di-Ras2 OS=Homo sapiens OX=9606 GN=DIRAS2 PE=1 SV=1 | DIRAS2 | up | 2.080482024 | 2.610370277 |
| O75828 | Carbonyl reductase [NADPH] 3 OS=Homo sapiens OX=9606 GN=CBR3 PE=1 SV=3 | CBR3 | up | 1.994319981 | 1.515272725 |
| P02768 | Albumin OS=Homo sapiens OX=9606 GN=ALB PE=1 SV=2 | ALB | up | 1.965452018 | 1.957701278 |
| P01040 | Cystatin-A OS=Homo sapiens OX=9606 GN=CSTA PE=1 SV=1 | CSTA | up | 1.872963274 | 2.698069328 |
| Q969P5 | F-box only protein 32 OS=Homo sapiens OX=9606 GN=FBXO32 PE=1 SV=1 | FBXO32 | up | 1.848079356 | 1.558529985 |
| P0C0S5 | Histone H2A.Z OS=Homo sapiens OX=9606 GN=H2AZ1 PE=1 SV=2 | H2AZ1 | up | 1.830482024 | 3.15560954 |
| P06576 | ATP synthase subunit beta, mitochondrial OS=Homo sapiens OX=9606 GN=ATP5F1B PE=1 SV=3 | ATP5F1B | up | 1.807204673 | 2.876908076 |
| A6NMY6 | Putative annexin A2-like protein OS=Homo sapiens OX=9606 GN=ANXA2P2 PE=5 SV=2 | ANXA2P2 | up | 1.646240625 | 3.359102302 |
| Q86YZ3 | Hornerin OS=Homo sapiens OX=9606 GN=HRNR PE=1 SV=2 | HRNR | up | 1.598079356 | 1.453680565 |
| P62937 | Peptidyl-prolyl cis-trans isomerase A OS=Homo sapiens OX=9606 GN=PPIA PE=1 SV=2 | PPIA | up | 1.580482024 | 1.602437948 |
| Q4G0N8 | Sodium/hydrogen exchanger 10 OS=Homo sapiens OX=9606 GN=SLC9C1 PE=2 SV=2 | SLC9C1 | up | 1.54248125 | 1.498602518 |
| P30041 | Peroxiredoxin-6 OS=Homo sapiens OX=9606 GN=PRDX6 PE=1 SV=3 | PRDX6 | up | 1.5 | 1.619640458 |
| C9JRZ8 | Aldo-keto reductase family 1 member B15 OS=Homo sapiens OX=9606 GN=AKR1B15 PE=1 SV=2 | AKR1B15 | up | 1.476722649 | 2.48164896 |
| P50914 | 60S ribosomal protein L14 OS=Homo sapiens OX=9606 GN=RPL14 PE=1 SV=4 | RPL14 | up | 1.476722649 | 1.545336338 |
| P53804 | E3 ubiquitin-protein ligase TTC3 OS=Homo sapiens OX=9606 GN=TTC3 PE=1 SV=2 | TTC3 | up | 1.396240625 | 1.583559352 |
| P22061 | Protein-L-isoaspartate(D-aspartate) O-methyltransferase OS=Homo sapiens OX=9606 GN=PCMT1 PE=1 SV=4 | PCMT1 | up | 1.372963274 | 1.509074459 |
| P0DMV8 | Heat shock 70 kDa protein 1A OS=Homo sapiens OX=9606 GN=HSPA1A PE=1 SV=1 | HSPA1A | up | 1.344611005 | 2.261366496 |
| P17066 | Heat shock 70 kDa protein 6 OS=Homo sapiens OX=9606 GN=HSPA6 PE=1 SV=2 | HSPA6 | up | 1.263864898 | 2.47712768 |
| P34931 | Heat shock 70 kDa protein 1-like OS=Homo sapiens OX=9606 GN=HSPA1L PE=1 SV=2 | HSPA1L | up | 1.253836163 | 2.701548766 |
| Q13618 | Cullin-3 OS=Homo sapiens OX=9606 GN=CUL3 PE=1 SV=2 | CUL3 | up | 1.25 | 1.397312877 |
| Q6NSI8 | Uncharacterized protein KIAA1841 OS=Homo sapiens OX=9606 GN=KIAA1841 PE=2 SV=2 | KIAA1841 | up | 1.226722649 | 1.333618812 |
| O75688 | Protein phosphatase 1B OS=Homo sapiens OX=9606 GN=PPM1B PE=1 SV=1 | PPM1B | up | 1.188721876 | 1.619640458 |
| A6NE01 | Protein FAM186A OS=Homo sapiens OX=9606 GN=FAM186A PE=2 SV=3 | FAM186A | up | 1.146240625 | 3.6423 |
| P05109 | Protein S100-A8 OS=Homo sapiens OX=9606 GN=S100A8 PE=1 SV=1 | S100A8 | up | 1.146240625 | 1.415961825 |
| P53597 | Succinate--CoA ligase [ADP/GDP-forming] subunit alpha, mitochondrial OS=Homo sapiens OX=9606 GN=SUCLG1 PE=1 SV=4 | SUCLG1 | up | 1.146240625 | 1.415961825 |
| P11142 | Heat shock cognate 71 kDa protein OS=Homo sapiens OX=9606 GN=HSPA8 PE=1 SV=1 | HSPA8 | up | 1.095070983 | 2.81944817 |
| Q5VSP4 | Putative lipocalin 1-like protein 1 OS=Homo sapiens OX=9606 GN=LCN1P1 PE=5 SV=1 | LCN1P1 | up | 1.04248125 | 1.499773959 |
| P29508 | Serpin B3 OS=Homo sapiens OX=9606 GN=SERPINB3 PE=1 SV=2 | SERPINB3 | up | 1 | 1.302550402 |
| P32119 | Peroxiredoxin-2 OS=Homo sapiens OX=9606 GN=PRDX2 PE=1 SV=5 | PRDX2 | no significance | 1.29248125 | 1.266851649 |
| P40925 | Malate dehydrogenase, cytoplasmic OS=Homo sapiens OX=9606 GN=MDH1 PE=1 SV=4 | MDH1 | no significance | 1.146240625 | 1.121355454 |
| O43741 | 5~-AMP-activated protein kinase subunit beta-2 OS=Homo sapiens OX=9606 GN=PRKAB2 PE=1 SV=1 | PRKAB2 | no significance | 1.146240625 | 1.121355454 |
| Q8NF91 | Nesprin-1 OS=Homo sapiens OX=9606 GN=SYNE1 PE=1 SV=4 | SYNE1 | no significance | 1.146240625 | 1.121355454 |
| Q06830 | Peroxiredoxin-1 OS=Homo sapiens OX=9606 GN=PRDX1 PE=1 SV=1 | PRDX1 | no significance | 0.200081914 | 0.054813616 |
| P13639 | Elongation factor 2 OS=Homo sapiens OX=9606 GN=EEF2 PE=1 SV=4 | EEF2 | no significance | 0.09409397 | 0.055301638 |
| P62987 | Ubiquitin-60S ribosomal protein L40 OS=Homo sapiens OX=9606 GN=UBA52 PE=1 SV=2 | UBA52 | no significance | -0.07252285 | 0.08134344 |
| O60784 | Target of Myb protein 1 OS=Homo sapiens GN=TOM1 PE=1 SV=2 | TOM1 | no significance | -1.201838731 | 1.06741148 |
| Q9UHX1 | Poly(U)-binding-splicing factor PUF60 OS=Homo sapiens GN=PUF60 PE=1 SV=1 | PUF60 | no significance | -1.451838731 | 1.263931796 |
| P43243 | Matrin-3 OS=Homo sapiens GN=MATR3 PE=1 SV=2 | MATR3 | no significance | -1.5 | 1.2281092 |
| P05023 | Sodium/potassium-transporting ATPase subunit alpha-1 OS=Homo sapiens GN=ATP1A1 PE=1 SV=1 | ATP1A1 | no significance | -1.79248125 | 1.292960461 |
| P09874 | Poly [ADP-ribose] polymerase 1 OS=Homo sapiens GN=PARP1 PE=1 SV=4 | PARP1 | no significance | -1.938721876 | 0.970340791 |
| Q15393 | Splicing factor 3B subunit 3 OS=Homo sapiens GN=SF3B3 PE=1 SV=4 | SF3B3 | no significance | -1.953445298 | 1.27747953 |
| O60825 | 6-phosphofructo-2-kinase/fructose-2,6-biphosphatase 2 OS=Homo sapiens GN=PFKFB2 PE=1 SV=2 | PFKFB2 | no significance | -2.255591953 | 1.238689639 |
| P25311 | Zinc-alpha-2-glycoprotein OS=Homo sapiens OX=9606 GN=AZGP1 PE=1 SV=2 | AZGP1 | down | 0.896240625 | 1.462635754 |
| Q8TE82 | SH3 domain and tetratricopeptide repeat-containing protein 1 OS=Homo sapiens OX=9606 GN=SH3TC1 PE=1 SV=3 | SH3TC1 | down | 0.896240625 | 1.462635754 |
| Q12931 | Heat shock protein 75 kDa, mitochondrial OS=Homo sapiens OX=9606 GN=TRAP1 PE=1 SV=3 | TRAP1 | down | -0.810078582 | 2.127257225 |
| P07910 | Heterogeneous nuclear ribonucleoproteins C1/C2 OS=Homo sapiens GN=HNRNPC PE=1 SV=4 | HNRNPC | down | -1.25 | 1.397312877 |
| Q02978 | Mitochondrial 2-oxoglutarate/malate carrier protein OS=Homo sapiens GN=SLC25A11 PE=1 SV=3 | SLC25A11 | down | -1.29248125 | 1.577733141 |
| O75746 | Calcium-binding mitochondrial carrier protein Aralar1 OS=Homo sapiens GN=SLC25A12 PE=1 SV=2 | SLC25A12 | down | -1.330482024 | 1.351681489 |
| Q13509 | Tubulin beta-3 chain OS=Homo sapiens OX=9606 GN=TUBB3 PE=1 SV=2 | TUBB3 | down | -1.344219841 | 2.658010083 |
| Q07955 | Splicing factor, arginine/serine-rich 1 OS=Homo sapiens GN=SFRS1 PE=1 SV=2 | SFRS1 | down | -1.396240625 | 1.583559352 |
| Q99832 | T-complex protein 1 subunit eta OS=Homo sapiens GN=CCT7 PE=1 SV=2 | CCT7 | down | -1.396240625 | 1.305317339 |
| Q86V81 | THO complex subunit 4 OS=Homo sapiens GN=THOC4 PE=1 SV=3 | THOC4 | down | -1.494319981 | 1.388977506 |
| Q15233 | Non-POU domain-containing octamer-binding protein OS=Homo sapiens GN=NONO PE=1 SV=4 | NONO | down | -1.557204673 | 1.532001156 |
| P50990 | T-complex protein 1 subunit theta OS=Homo sapiens GN=CCT8 PE=1 SV=4 | CCT8 | down | -1.622963274 | 1.502820689 |
| P25205 | DNA replication licensing factor MCM3 OS=Homo sapiens GN=MCM3 PE=1 SV=3 | MCM3 | down | -1.660964047 | 2.31792056 |
| P62899 | 60S ribosomal protein L31 OS=Homo sapiens GN=RPL31 PE=1 SV=1 | RPL31 | down | -1.726722649 | 1.345744688 |
| P07437 | Tubulin beta chain OS=Homo sapiens OX=9606 GN=TUBB PE=1 SV=2 | TUBB | down | -1.737547798 | 2.96612835 |
| O43242 | 26S proteasome non-ATPase regulatory subunit 3 OS=Homo sapiens GN=PSMD3 PE=1 SV=2 | PSMD3 | down | -1.782320754 | 1.557298123 |
| P42766 | 60S ribosomal protein L35 OS=Homo sapiens GN=RPL35 PE=1 SV=2 | RPL35 | down | -1.79248125 | 1.462635754 |
| Q5T2N8 | ATPase family AAA domain-containing protein 3C OS=Homo sapiens GN=ATAD3C PE=1 SV=2 | ATAD3C | down | -1.807204673 | 1.380824569 |
| O60506 | Heterogeneous nuclear ribonucleoprotein Q OS=Homo sapiens GN=SYNCRIP PE=1 SV=2 | SYNCRIP | down | -1.807204673 | 1.380824569 |
| P05386 | 60S acidic ribosomal protein P1 OS=Homo sapiens GN=RPLP1 PE=1 SV=1 | RPLP1 | down | -1.862802778 | 1.591726796 |
| P07900 | Heat shock protein HSP 90-alpha OS=Homo sapiens OX=9606 GN=HSP90AA1 PE=1 SV=5 | HSP90AA1 | down | -1.870617965 | 2.3096941 |
| P09874 | Splicing factor, arginine/serine-rich 7 OS=Homo sapiens GN=SFRS7 PE=1 SV=1 | SFRS7 | down | -1.928561379 | 1.59993285 |
| Q9BQE3 | Tubulin alpha-1C chain OS=Homo sapiens OX=9606 GN=TUBA1C PE=1 SV=1 | TUBA1C | down | -1.962088525 | 3.693346047 |
| Q00325 | Phosphate carrier protein, mitochondrial OS=Homo sapiens GN=SLC25A3 PE=1 SV=2 | SLC25A3 | down | -2.04248125 | 3.060304695 |
| Q14974 | Importin subunit beta-1 OS=Homo sapiens GN=KPNB1 PE=1 SV=2 | KPNB1 | down | -2.057204673 | 2.200316244 |
| P23528 | Cofilin-1 OS=Homo sapiens GN=CFL1 PE=1 SV=3 | CFL1 | down | -2.057204673 | 1.478735167 |
| Q9BVP2 | Guanine nucleotide-binding protein-like 3 OS=Homo sapiens GN=GNL3 PE=1 SV=2 | GNL3 | down | -2.071350555 | 1.349904137 |
| O43143 | Putative pre-mRNA-splicing factor ATP-dependent RNA helicase DHX15 OS=Homo sapiens GN=DHX15 PE=1 SV=2 | DHX15 | down | -2.098079356 | 1.304051818 |
| P17987 | T-complex protein 1 subunit alpha OS=Homo sapiens GN=TCP1 PE=1 SV=1 | TCP1 | down | -2.160964047 | 1.552980676 |
| Q02878 | 60S ribosomal protein L6 OS=Homo sapiens GN=RPL6 PE=1 SV=3 | RPL6 | down | -2.195339928 | 1.718650995 |
| P51153 | Ras-related protein Rab-13 OS=Homo sapiens GN=RAB13 PE=1 SV=1 | RAB13 | down | -2.226722649 | 3.522737178 |
| P17844 | Probable ATP-dependent RNA helicase DDX5 OS=Homo sapiens GN=DDX5 PE=1 SV=1 | DDX5 | down | -2.26109853 | 1.316558387 |
| P62249 | 40S ribosomal protein S16 OS=Homo sapiens GN=RPS16 PE=1 SV=2 | RPS16 | down | -2.29248125 | 1.561842994 |
| P62847 | 40S ribosomal protein S24 OS=Homo sapiens GN=RPS24 PE=1 SV=1 | RPS24 | down | -2.316696635 | 2.323699174 |
| P46776 | 60S ribosomal protein L27a OS=Homo sapiens GN=RPL27A PE=1 SV=2 | RPL27A | down | -2.341580554 | 2.948483945 |
| Q9Y657 | Spindlin-1 OS=Homo sapiens GN=SPIN1 PE=1 SV=3 | SPIN1 | down | -2.372963274 | 5.589018674 |
| P52597 | Heterogeneous nuclear ribonucleoprotein F OS=Homo sapiens GN=HNRNPF PE=1 SV=3 | HNRNPF | down | -2.387686696 | 1.491832054 |
| P40227 | T-complex protein 1 subunit zeta OS=Homo sapiens GN=CCT6A PE=1 SV=3 | CCT6A | down | -2.390560606 | 3.905322699 |
| P46782 | 40S ribosomal protein S5 OS=Homo sapiens GN=RPS5 PE=1 SV=4 | RPS5 | down | -2.42510993 | 1.585521402 |
| P25789 | Proteasome subunit alpha type-4 OS=Homo sapiens GN=PSMA4 PE=1 SV=1 | PSMA4 | down | -2.428561379 | 2.619332376 |
| Q9Y2H1 | Serine/threonine-protein kinase 38-like OS=Homo sapiens GN=STK38L PE=1 SV=3 | STK38L | down | -2.460587586 | 2.226529683 |
| O43175 | D-3-phosphoglycerate dehydrogenase OS=Homo sapiens GN=PHGDH PE=1 SV=4 | PHGDH | down | -2.476722649 | 2.527539489 |
| P10809 | 60 kDa heat shock protein, mitochondrial OS=Homo sapiens GN=HSPD1 PE=1 SV=2 | HSPD1 | down | -2.476722649 | 1.470323142 |
| P60709 | Actin, cytoplasmic 1 OS=Homo sapiens OX=9606 GN=ACTB PE=1 SV=1 | ACTB | down | -2.477329333 | 1.980890104 |
| P25705 | ATP synthase subunit alpha, mitochondrial OS=Homo sapiens GN=ATP5A1 PE=1 SV=1 | ATP5A1 | down | -2.481203126 | 3.054527177 |
| Q9HAV4 | Exportin-5 OS=Homo sapiens GN=XPO5 PE=1 SV=1 | XPO5 | down | -2.484159485 | 4.80661651 |
| P07477 | Trypsin-1 OS=Homo sapiens GN=PRSS1 PE=1 SV=1 | PRSS1 | down | -2.494319981 | 5.157902272 |
| P50991 | T-complex protein 1 subunit delta OS=Homo sapiens GN=CCT4 PE=1 SV=4 | CCT4 | down | -2.55357978 | 2.456590362 |
| O95831 | Apoptosis-inducing factor 1, mitochondrial OS=Homo sapiens GN=AIFM1 PE=1 SV=1 | AIFM1 | down | -2.557204673 | 2.234038519 |
| Q12906 | Interleukin enhancer-binding factor 3 OS=Homo sapiens GN=ILF3 PE=1 SV=3 | ILF3 | down | -2.564346961 | 2.470460191 |
| Q16643 | Drebrin OS=Homo sapiens GN=DBN1 PE=1 SV=4 | DBN1 | down | -2.571350555 | 1.521768029 |
| P48643 | T-complex protein 1 subunit epsilon OS=Homo sapiens GN=CCT5 PE=1 SV=1 | CCT5 | down | -2.574802005 | 2.291612134 |
| Q96L21 | 60S ribosomal protein L10-like OS=Homo sapiens GN=RPL10L PE=1 SV=3 | RPL10L | down | -2.580482024 | 3.554450107 |
| P06748 | Nucleophosmin OS=Homo sapiens GN=NPM1 PE=1 SV=2 | NPM1 | down | -2.614857905 | 1.575061242 |
| P62851 | 40S ribosomal protein S25 OS=Homo sapiens GN=RPS25 PE=1 SV=1 | RPS25 | down | -2.62694866 | 2.417443337 |
| Q9Y265 | RuvB-like 1 OS=Homo sapiens GN=RUVBL1 PE=1 SV=1 | RUVBL1 | down | -2.640560606 | 2.449565181 |
| P46777 | 60S ribosomal protein L5 OS=Homo sapiens GN=RPL5 PE=1 SV=3 | RPL5 | down | -2.646240625 | 2.863148161 |
| P49368 | T-complex protein 1 subunit gamma OS=Homo sapiens GN=CCT3 PE=1 SV=4 | CCT3 | down | -2.678561379 | 2.432525354 |
| Q07020 | 60S ribosomal protein L18 OS=Homo sapiens OX=9606 GN=RPL18 PE=1 SV=2 | RPL18 | down | -2.707430684 | 2.439847578 |
| P23588 | Eukaryotic translation initiation factor 4B OS=Homo sapiens GN=EIF4B PE=1 SV=2 | EIF4B | down | -2.782320754 | 1.626422616 |
| Q92841 | Probable ATP-dependent RNA helicase DDX17 OS=Homo sapiens GN=DDX17 PE=1 SV=1 | DDX17 | down | -2.798073204 | 3.017427536 |
| Q9BUA3 | Uncharacterized protein C11orf84 OS=Homo sapiens GN=C11orf84 PE=1 SV=3 | C11orf84 | down | -2.814346961 | 2.844187046 |
| P62913 | 60S ribosomal protein L11 OS=Homo sapiens OX=9606 GN=RPL11 PE=1 SV=2 | RPL11 | down | -2.842263002 | 2.742301664 |
| P62269 | 40S ribosomal protein S18 OS=Homo sapiens GN=RPS18 PE=1 SV=3 | RPS18 | down | -2.863831805 | 2.019119937 |
| P67809 | Nuclease-sensitive element-binding protein 1 OS=Homo sapiens GN=YBX1 PE=1 SV=3 | YBX1 | down | -2.915444524 | 4.293721352 |
| Q8NC51 | Plasminogen activator inhibitor 1 RNA-binding protein OS=Homo sapiens GN=SERBP1 PE=1 SV=2 | SERBP1 | down | -2.946158711 | 2.033028935 |
| P46783 | 40S ribosomal protein S10 OS=Homo sapiens GN=RPS10 PE=1 SV=1 | RPS10 | down | -2.952542484 | 1.558227875 |
| O00571 | ATP-dependent RNA helicase DDX3X OS=Homo sapiens GN=DDX3X PE=1 SV=3 | DDX3X | down | -3.023189285 | 4.802508791 |
| P84103 | Splicing factor, arginine/serine-rich 3 OS=Homo sapiens GN=SFRS3 PE=1 SV=1 | SFRS3 | down | -3.049918086 | 4.574871094 |
| P46781 | 40S ribosomal protein S9 OS=Homo sapiens GN=RPS9 PE=1 SV=3 | RPS9 | down | -3.074802005 | 2.198283017 |
| Q9ULV4 | Coronin-1C OS=Homo sapiens GN=CORO1C PE=1 SV=1 | CORO1C | down | -3.077298027 | 1.470282624 |
| P68104 | Elongation factor 1-alpha 1 OS=Homo sapiens OX=9606 GN=EEF1A1 PE=1 SV=1 | EEF1A1 | down | -3.092399337 | 2.085012878 |
| P62750 | 60S ribosomal protein L23a OS=Homo sapiens GN=RPL23A PE=1 SV=1 | RPL23A | down | -3.098079356 | 2.764646161 |
| P61978 | Heterogeneous nuclear ribonucleoprotein K OS=Homo sapiens GN=HNRNPK PE=1 SV=1 | HNRNPK | down | -3.188930538 | 2.299706244 |
| P27635 | 60S ribosomal protein L10 OS=Homo sapiens GN=RPL10 PE=1 SV=4 | RPL10 | down | -3.209160537 | 3.596288349 |
| Q15208 | Serine/threonine-protein kinase 38 OS=Homo sapiens OX=9606 GN=STK38 PE=1 SV=1 | STK38 | down | -3.236795079 | 2.807524836 |
| P62280 | 40S ribosomal protein S11 OS=Homo sapiens GN=RPS11 PE=1 SV=3 | RPS11 | down | -3.274795853 | 4.048469073 |
| Q16875 | 6-phosphofructo-2-kinase/fructose-2,6-biphosphatase 3 OS=Homo sapiens GN=PFKFB3 PE=1 SV=1 | PFKFB3 | down | -3.282320754 | 2.686479009 |
| Q9UJS0 | Calcium-binding mitochondrial carrier protein Aralar2 OS=Homo sapiens GN=SLC25A13 PE=1 SV=2 | SLC25A13 | down | -3.304262228 | 2.390546476 |
| P26373 | 60S ribosomal protein L13 OS=Homo sapiens OX=9606 GN=RPL13 PE=1 SV=4 | RPL13 | down | -3.341355062 | 2.819929005 |
| Q9UNX3 | 60S ribosomal protein L26-like 1 OS=Homo sapiens GN=RPL26L1 PE=1 SV=1 | RPL26L1 | down | -3.341580554 | 5.320201588 |
| P40429 | 60S ribosomal protein L13a OS=Homo sapiens GN=RPL13A PE=1 SV=2 | RPL13A | down | -3.378555227 | 4.609927572 |
| P59190 | Ras-related protein Rab-15 OS=Homo sapiens GN=RAB15 PE=1 SV=1 | RAB15 | down | -3.392463902 | 4.58480822 |
| P62277 | 40S ribosomal protein S13 OS=Homo sapiens GN=RPS13 PE=1 SV=2 | RPS13 | down | -3.397178659 | 3.189765491 |
| P62917 | 60S ribosomal protein L8 OS=Homo sapiens GN=RPL8 PE=1 SV=2 | RPL8 | down | -3.401832578 | 3.444867832 |
| P52292 | Importin subunit alpha-2 OS=Homo sapiens GN=KPNA2 PE=1 SV=1 | KPNA2 | down | -3.412931108 | 4.637053694 |
| P63244 | Guanine nucleotide-binding protein subunit beta-2-like 1 OS=Homo sapiens GN=GNB2L1 PE=1 SV=3 | GNB2L1 | down | -3.456040802 | 1.919838386 |
| Q5T9A4 | ATPase family AAA domain-containing protein 3B OS=Homo sapiens GN=ATAD3B PE=1 SV=1 | ATAD3B | down | -3.47104263 | 3.035298649 |
| P15880 | 40S ribosomal protein S2 OS=Homo sapiens GN=RPS2 PE=1 SV=2 | RPS2 | down | -3.514413335 | 2.653130987 |
| P18124 | 60S ribosomal protein L7 OS=Homo sapiens OX=9606 GN=RPL7 PE=1 SV=1 | RPL7 | down | -3.520980621 | 2.745658544 |
| P11940 | Polyadenylate-binding protein 1 OS=Homo sapiens GN=PABPC1 PE=1 SV=2 | PABPC1 | down | -3.704383332 | 4.135248975 |
| P84098 | 60S ribosomal protein L19 OS=Homo sapiens GN=RPL19 PE=1 SV=1 | RPL19 | down | -3.775821952 | 3.097435835 |
| P08865 | 40S ribosomal protein SA OS=Homo sapiens GN=RPSA PE=1 SV=4 | RPSA | down | -3.780909113 | 3.445828632 |
| Q15750 | Mitogen-activated protein kinase kinase kinase 7-interacting protein 1 OS=Homo sapiens GN=MAP3K7IP1 PE=1 SV=1 | MAP3K7IP1 | down | -3.793419284 | 2.863866582 |
| P08708 | 40S ribosomal protein S17 OS=Homo sapiens GN=RPS17 PE=1 SV=2 | RPS17 | down | -3.798073204 | 2.823416555 |
| P08238 | Heat shock protein HSP 90-beta OS=Homo sapiens OX=9606 GN=HSP90AB1 PE=1 SV=4 | HSP90AB1 | down | -3.807118788 | 2.304143169 |
| P52272 | Heterogeneous nuclear ribonucleoprotein M OS=Homo sapiens GN=HNRNPM PE=1 SV=3 | HNRNPM | down | -3.849685923 | 4.42796521 |
| P05387 | 60S acidic ribosomal protein P2 OS=Homo sapiens GN=RPLP2 PE=1 SV=1 | RPLP2 | down | -3.853051488 | 5.450544384 |
| P61247 | 40S ribosomal protein S3a OS=Homo sapiens GN=RPS3A PE=1 SV=2 | RPS3A | down | -3.892463902 | 2.113555 |
| P83731 | 60S ribosomal protein L24 OS=Homo sapiens GN=RPL24 PE=1 SV=1 | RPL24 | down | -3.901659136 | 5.088148273 |
| P98175 | RNA-binding protein 10 OS=Homo sapiens GN=RBM10 PE=1 SV=3 | RBM10 | down | -3.911287945 | 1.563448228 |
| Q9NVI7 | ATPase family AAA domain-containing protein 3A OS=Homo sapiens GN=ATAD3A PE=1 SV=2 | ATAD3A | down | -3.956438458 | 3.291334093 |
| P62701 | 40S ribosomal protein S4, X isoform OS=Homo sapiens GN=RPS4X PE=1 SV=2 | RPS4X | down | -3.960882134 | 3.794999834 |
| Q9H082 | Ras-related protein Rab-33B OS=Homo sapiens GN=RAB33B PE=1 SV=1 | RAB33B | down | -3.97868971 | 5.107241308 |
| Q14964 | Ras-related protein Rab-39A OS=Homo sapiens GN=RAB39 PE=2 SV=2 | RAB39 | down | -3.97868971 | 5.107241308 |
| Q9NZI8 | Insulin-like growth factor 2 mRNA-binding protein 1 OS=Homo sapiens GN=IGF2BP1 PE=1 SV=1 | IGF2BP1 | down | -3.98945689 | 2.901825499 |
| P39023 | 60S ribosomal protein L3 OS=Homo sapiens GN=RPL3 PE=1 SV=2 | RPL3 | down | -3.992402841 | 3.9923971 |
| P05141 | ADP/ATP translocase 2 OS=Homo sapiens OX=9606 GN=SLC25A5 PE=1 SV=7 | SLC25A5 | down | -3.995023735 | 2.636177925 |
| P31943 | Heterogeneous nuclear ribonucleoprotein H OS=Homo sapiens GN=HNRNPH1 PE=1 SV=4 | HNRNPH1 | down | -4.120449858 | 4.681100649 |
| P62081 | 40S ribosomal protein S7 OS=Homo sapiens GN=RPS7 PE=1 SV=1 | RPS7 | down | -4.123901308 | 3.256467674 |
| P62753 | 40S ribosomal protein S6 OS=Homo sapiens GN=RPS6 PE=1 SV=1 | RPS6 | down | -4.158042909 | 5.35726183 |
| P62241 | 40S ribosomal protein S8 OS=Homo sapiens GN=RPS8 PE=1 SV=2 | RPS8 | down | -4.183041856 | 4.250275653 |
| P30050 | 60S ribosomal protein L12 OS=Homo sapiens GN=RPL12 PE=1 SV=1 | RPL12 | down | -4.235766052 | 5.169834412 |
| P18621 | 60S ribosomal protein L17 OS=Homo sapiens GN=RPL17 PE=1 SV=3 | RPL17 | down | -4.236795079 | 5.508642676 |
| P46778 | 60S ribosomal protein L21 OS=Homo sapiens GN=RPL21 PE=1 SV=2 | RPL21 | down | -4.240780465 | 4.616274881 |
| P19338 | Nucleolin OS=Homo sapiens GN=NCL PE=1 SV=3 | NCL | down | -4.306075802 | 2.495534946 |
| P62424 | 60S ribosomal protein L7a OS=Homo sapiens GN=RPL7A PE=1 SV=2 | RPL7A | down | -4.309171733 | 5.578880355 |
| Q92930 | Ras-related protein Rab-8B OS=Homo sapiens GN=RAB8B PE=1 SV=2 | RAB8B | down | -4.466179539 | 5.438158925 |
| P36578 | 60S ribosomal protein L4 OS=Homo sapiens GN=RPL4 PE=1 SV=5 | RPL4 | down | -4.468697321 | 3.692037012 |
| P32969 | 60S ribosomal protein L9 OS=Homo sapiens GN=RPL9 PE=1 SV=1 | RPL9 | down | -4.548560564 | 4.667610213 |
| P62906 | 60S ribosomal protein L10a OS=Homo sapiens GN=RPL10A PE=1 SV=2 | RPL10A | down | -4.607551877 | 7.184751443 |
| Q00839 | Heterogeneous nuclear ribonucleoprotein U OS=Homo sapiens GN=HNRNPU PE=1 SV=6 | HNRNPU | down | -4.609860334 | 3.14717276 |
| P20340 | Ras-related protein Rab-6A OS=Homo sapiens GN=RAB6A PE=1 SV=3 | RAB6A | down | -4.691088322 | 5.733819275 |
| Q8WWY3 | U4/U6 small nuclear ribonucleoprotein Prp31 OS=Homo sapiens GN=PRPF31 PE=1 SV=2 | PRPF31 | down | -4.762568452 | 4.448535516 |
| P23396 | 40S ribosomal protein S3 OS=Homo sapiens GN=RPS3 PE=1 SV=2 | RPS3 | down | -5.243961992 | 4.419679508 |
| P61006 | Ras-related protein Rab-8A OS=Homo sapiens GN=RAB8A PE=1 SV=1 | RAB8A | down | -5.306013965 | 5.386300091 |
| P61026 | Ras-related protein Rab-10 OS=Homo sapiens GN=RAB10 PE=1 SV=1 | RAB10 | down | -5.442297234 | 5.536870106 |
| O14744 | Protein arginine N-methyltransferase 5 OS=Homo sapiens GN=PRMT5 PE=1 SV=4 | PRMT5 | down | -5.99029631 | 3.038017374 |
| P68371 | Tubulin beta-2C chain OS=Homo sapiens GN=TUBB2C PE=1 SV=1 | TUBB2C | down | -6.405671263 | 6.268041152 |

| **Supplementary Table 3. Ubiquitin-modified substrates associated with BipD in HEK293T cells by LC-MS/MS analysis** | | | | |
| --- | --- | --- | --- | --- |
| UniProt Accession | Protein Description | Gene Name | log2FC | -log10(P-value) |
| Q8N490 | Probable hydrolase PNKD OS=Homo sapiens OX=9606 GN=PNKD PE=1 SV=2 | PNKD | 3.437405312 | 2.239024717 |
| P30041 | Peroxiredoxin-6 OS=Homo sapiens OX=9606 GN=PRDX6 PE=1 SV=3 | PRDX6 | 2.807354922 | 3.921683734 |
| Q16891 | MICOS complex subunit MIC60 OS=Homo sapiens OX=9606 GN=IMMT PE=1 SV=1 | IMMT | 2.765534746 | 4.476234926 |
| P82930 | 28S ribosomal protein S34, mitochondrial OS=Homo sapiens OX=9606 GN=MRPS34 PE=1 SV=2 | MRPS34 | 2.760049207 | 3.391422051 |
| P29372 | DNA-3-methyladenine glycosylase OS=Homo sapiens OX=9606 GN=MPG PE=1 SV=3 | MPG | 2.748742762 | 2.781170546 |
| O75746 | Calcium-binding mitochondrial carrier protein Aralar1 OS=Homo sapiens OX=9606 GN=SLC25A12 PE=1 SV=2 | SLC25A12 | 2.491853096 | 2.157025688 |
| O75146 | Huntingtin-interacting protein 1-related protein OS=Homo sapiens OX=9606 GN=HIP1R PE=1 SV=2 | HIP1R | 2.409390936 | 1.965228487 |
| P47897 | Glutamine--tRNA ligase OS=Homo sapiens OX=9606 GN=QARS1 PE=1 SV=1 | QARS1 | 2.226770862 | 1.849577808 |
| Q7Z4H7 | HAUS augmin-like complex subunit 6 OS=Homo sapiens OX=9606 GN=HAUS6 PE=1 SV=2 | HAUS6 | 2.129283017 | 1.611994331 |
| Q5T9A4 | ATPase family AAA domain-containing protein 3B OS=Homo sapiens OX=9606 GN=ATAD3B PE=1 SV=1 | ATAD3B | 1.990084531 | 1.690246209 |
| Q08J23 | RNA cytosine C(5)-methyltransferase NSUN2 OS=Homo sapiens OX=9606 GN=NSUN2 PE=1 SV=2 | NSUN2 | 1.964666927 | 1.538297981 |
| O00116 | Alkyldihydroxyacetonephosphate synthase, peroxisomal OS=Homo sapiens OX=9606 GN=AGPS PE=1 SV=1 | AGPS | 1.932885804 | 1.897691005 |
| Q96QK1 | Vacuolar protein sorting-associated protein 35 OS=Homo sapiens OX=9606 GN=VPS35 PE=1 SV=2 | VPS35 | 1.809634662 | 1.307021421 |
| P36776 | Lon protease homolog, mitochondrial OS=Homo sapiens OX=9606 GN=LONP1 PE=1 SV=2 | LONP1 | 1.711494907 | 1.537408185 |
| P51398 | 28S ribosomal protein S29, mitochondrial OS=Homo sapiens OX=9606 GN=DAP3 PE=1 SV=1 | DAP3 | 1.652076697 | 1.305019861 |
| O95573 | Long-chain-fatty-acid--CoA ligase 3 OS=Homo sapiens OX=9606 GN=ACSL3 PE=1 SV=3 | ACSL3 | 1.64385619 | 1.464850793 |
| Q9Y2R9 | 28S ribosomal protein S7, mitochondrial OS=Homo sapiens OX=9606 GN=MRPS7 PE=1 SV=2 | MRPS7 | 1.631612594 | 1.463900735 |
| Q3ZCQ8 | Mitochondrial import inner membrane translocase subunit TIM50 OS=Homo sapiens OX=9606 GN=TIMM50 PE=1 SV=2 | TIMM50 | 1.584962501 | 1.552566146 |
| P49588 | Alanine--tRNA ligase, cytoplasmic OS=Homo sapiens OX=9606 GN=AARS1 PE=1 SV=2 | AARS1 | 1.514573173 | 1.997414527 |
| P34932 | Heat shock 70 kDa protein 4 OS=Homo sapiens OX=9606 GN=HSPA4 PE=1 SV=4 | HSPA4 | 1.072669068 | 1.582308784 |
| Q13501 | Sequestosome-1 OS=Homo sapiens OX=9606 GN=SQSTM1 PE=1 SV=1 | SQSTM1 | 0.857259828 | 1.350144983 |
| P62699 | Protein yippee-like 5 OS=Homo sapiens OX=9606 GN=YPEL5 PE=1 SV=1 | YPEL5 | 1.795180208 | 1.44661039 |
| P0DMV8 | Heat shock 70 kDa protein 1A OS=Homo sapiens OX=9606 GN=HSPA1A PE=1 SV=1 | HSPA1A | 4.042348015 | 1.60949052 |

| **Supplementary Table 4. Sequences of primers and plasmids construction used in this study** | | |
| --- | --- | --- |
| Use | Name | Sequence (5'-3') |
| mtDNA/nDNA qPCR | M-mtAtp6-F | TTCCACTATGAGCTGGAGCCGTAAT |
|  | M-mtAtp6-R | CGGACTGCTAATGCCATTGGTTGA |
|  | M-Rlp13a-F | GGGCAGGTTCTGGTATTGGAT |
|  | M-Rlp13a-R | GGCTCGGAAATGGTAGGGG |
|  |  |  |
| Gene expression qPCR | Pink1-qpF | TTCTTCCGCCAGTCGGTAG |
|  | Pink1-qpR | CTGCTTCTCCTCGATCAGCC |
|  | Prkn-qpF | GAGGTCGATTCTGACACCAGC |
|  | Prkn-qpR | CCGGCAAAAATCACACGCAG |
|  | Fundc1-qpF | AGCGATGACGAATCATACGAAG |
|  | Fundc1-qpR | CCACCCATTACAATCTGAGTAGC |
|  | Nlrx1-qpF | TAGGGCCTTTATCCGTTACCA |
|  | Nlrx1-qpF | TAAACCACTCGGTGAGGTTCC |
|  | Bnip3l-qpF | CTGGAGCACGTTCCTTCCTC |
|  | Bnip3l-qpR | ACAGTGCGAACTGCCTCTTG |
|  | Bnip3-qpF | CTGGGTAGAACTGCACTTCAG |
|  | Bnip3-qpR | GGAGCTACTTCGTCCAGATTCAT |
|  | Gapdh-qpF | GGATGCTGCCCTTACCC |
|  | Gapdh-qpR | GTTCACACCGACCTTCACC |
|  | Cul3-qpF | TCAGTCAGCCACACCAAA |
|  | Cul3-qpR | AACACCAACCTCAGATCCA |
|  | Klhl9-qpF | GGTGTCTCTGGGTAACGGC |
|  | Klhl9-qpR | AACTGTGCGTGTTGCTGGTAA |
|  | Klhl13-qpF | AGAATTGGTTGCTGCAATACTCC |
|  | Klhl13-qpR | AAGGCACAGTTTCAAGTGCTG |
|  | Immt-qpF | GAAATGCCTACCATCCCA |
|  | Immt-qpR | GGTTTCGTCAATCATCGC |
|  |  |  |
| KLHL9 deletion mutants construction | pcDNA4His-F | GGAATTCTGCAGATATCCAGCACAGT |
|  | pcDNA4His-R | AGGTACCTTATCGTCATCGTCGTACAGA |
|  | pcK9BTB-F | TGACGATAAGGTACCTATGAAAGTGTCCCTTGGTAACGG |
|  | pcK9BTB-R | ATCTGCAGAATTCCAGAGACTCCTGATATAAGAAATACTTTACAGAAATC |
|  | pcK9BACK-F | TGACGATAAGGTACCTTTGGATAACTGTGTTGAGGTTGGACGA |
|  | pcK9BACK-R | ATATCTGCAGAATTCCTGGCATCATTTGGTAATTGCTAGCTTCCA |
|  | pcK9Kelch-F | TGACGATAAGGTACCTTATATGCAGCCAGTGATGCAGTCAGATAG |
|  | pcK9Kelch-R | ATATCTGCAGAATTCCCTAAGAATGATCTGAAGGTGCTGAAAGAGGT |
|  |  |  |
| KLHL13 deletion mutants construction | pcK13BTB-F | TGACGATAAGGTACCTATGATGAGAGTTCAAACCTTAAGAGAAAAATG |
|  | pcK13BTB-R | ATATCTGCAGAATTCCGACCCCAGATATGAGAAACACTTTACAGAA |
|  | pcK13BACK-F | TGACGATAAGGTACCTACTTTAGACAACTGTGTTGAAGTTGGACG |
|  | pcK13BACK-R | ATATCTGCAGAATTCCTTGCACGTAATTAATGAGCTCCTGTGG |
|  | pcK13Kelch-F | TGACGATAAGGTACCTACGGTGGATTTCATGAGAACTGACAAT |
|  | pcK13Kelch-R | ATATCTGCAGAATTCCTTAAGGTGCAGAAAGAGGGGACTCTC |
|  |  |  |
| IMMT K122R construction | pcDNA4-IMMT-K122R-F | TGTATCAGAAGTAATGAAAGAATCTAGACAGCCTGCCTCAC |
| pcDNA4-IMMT-K122R-R | GTGAGGCAGGCTGTCTAGATTCTTTCATTACTTCTGATACA |
| IMMT K211R construction | pcDNA4-IMMT-K211R-F | GCTCGCCTTGCACAACAGGAAAGACAAGAACAAGTTAAAATT |
| pcDNA4-IMMT-K211R-R | AATTTTAACTTGTTCTTGTCTTTCCTGTTGTGCAAGGCGAGC |
| IMMT K216R construction | pcDNA4-IMMT-K216R-F | CAGGAAAAACAAGAACAAGTTAGAATTGAGTCTCTAGCCAAGAGC |
| pcDNA4-IMMT-K216R-R | GCTCTTGGCTAGAGACTCAATTCTAACTTGTTCTTGTTTTTCCTG |
| IMMT K370R construction | pcDNA4-IMMT-K370R-F | CCAAGCTCGGGATGACTTTAGACGAGAGCTGG |
| pcDNA4-IMMT-K370R-R | CCAGCTCTCGTCTAAAGTCATCCCGAGCTTGG |
| IMMT K467R construction | pcDNA4-IMMT-K467R-F | GGCTGAACAGGACAGAAGGATAGAAGAAGTCAGAG |
| pcDNA4-IMMT-K467R-R | CTCTGACTTCTTCTATCCTTCTGTCCTGTTCAGCC |
| IMMT K516R construction | pcDNA4-IMMT-K516R-F | GAATTTGAGCAGAACCTGTCTGAGAGACTCTCTGAACAA |
| pcDNA4-IMMT-K516R-R | TTGTTCAGAGAGTCTCTCAGACAGGTTCTGCTCAAATTC |
|  |  |  |
| cloning bipD into pK18mobsacB | BipD-up-F | CTATGACATGATTACGAATTCCGAGACGTCGTTGAGCAACTGATCG |
|  | BipD-up-R | GTGAACCACGACGAGGCCGCGCCCACGC |
|  | BipD-down-F | GCGGCCTCATCGTGGTTCACCTTCGTTCTATCG |
|  | BipD-down-R | ACGACGGCCAGTGCCAAGCTTTCAAGCAGTTCCACGCGG |
|  |  |  |
| cloning bipD into pUCP28T | bipD-F | TTTCTAGAATGAACATGCATGTCGACATGGG |
|  | bipDgfp-R | GTGGATCCCGGGCCCGCGGTACCGTCGACTGCAGGATCTGCAGATAGCTCTTGGCG |
